# Supplementary material
Source: publisher figshare collection journal article supplement (https://acs.figshare.com/ndownloader/files/3614583)

# Dissociation Pathways of Benzylpyridinium

## “Thermometer” Ions Depend on the Activation

### Regime: an IRMPD Spectroscopy Study

*Denis Morsa<sup>†</sup>, Valérie Gabelica<sup>†,||</sup>, Frédéric Rosu<sup>†,‡</sup>, Jos Oomens<sup>‡,§</sup>, and Edwin De Pauw<sup>\*,†</sup>*

<sup>†</sup> Mass Spectrometry Laboratory, University of Liege, B6c Sart-Tilman, B-4000 Liege, Belgium

<sup>‡</sup> Radboud University, Institute for Molecules and Materials, FELIX Laboratory, Toernooiveld 7, 6525ED Nijmegen, The Netherlands

<sup>§</sup> Van't Hoff Institute for Molecular Sciences, University of Amsterdam, Science Park 904, 1098 XH Amsterdam, The Netherlands

#### Present Addresses

<sup>||</sup> V.G.: U869 - ARNA Laboratory, Inserm & Univ. Bordeaux, F-33600 Pessac, France

<sup>‡</sup> F.R.: CNRS UMS 3033 & Inserm US001, IECB, Univ. Bordeaux, F-33600 Pessac, France

#### SUPPORTING INFORMATION

|            |                                                                                                                                                              |
|------------|--------------------------------------------------------------------------------------------------------------------------------------------------------------|
| <b>S-1</b> | <b>Mass spectra consecutive to IRMPD irradiation obtained using source voltages of 60 V and 100 V.</b>                                                       |
| <b>S-2</b> | <b>Potential energy surface (PES) relative to the dissociation of the <i>p</i>-(<i>tert</i>-butyl)benzylpyridinium cation under slow-heating activation.</b> |
| <b>S-3</b> | <b>IRMPD spectra of the <i>p</i>-(methyl)benzylpyridinium cation obtained using soft (blue trace) and harsh (red trace) source cone voltage conditions.</b>  |

**Figure S-1.** Mass spectra consecutive to IRMPD irradiation obtained using source voltages of 60 V (a) and 100 V (b).

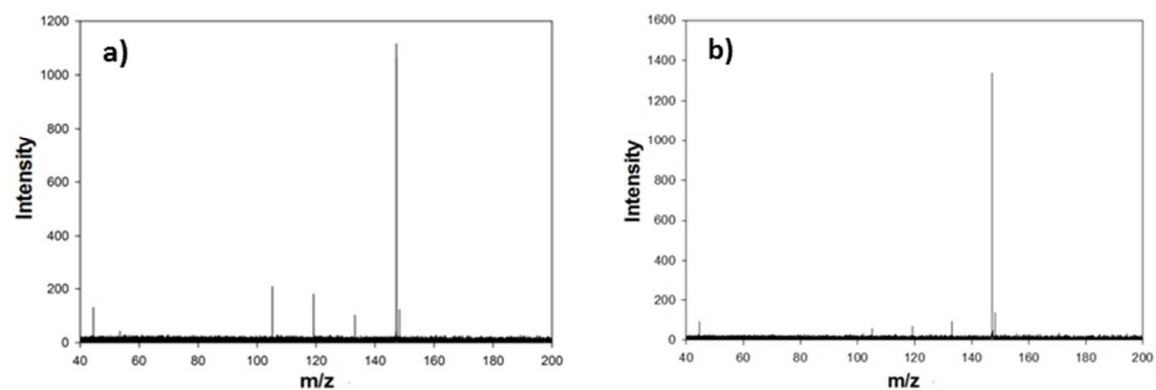

|             |                      |
|-------------|----------------------|
| $m/z = 147$ | $C_{11}H_{15}^+$ ion |
| $m/z = 132$ | $-CH_3$              |
| $m/z = 119$ | $-C_2H_4$            |
| $m/z = 105$ | $-C_3H_6$            |

**Figure S-2.** Potential energy surface (PES) relative to the dissociation of the *p*-(*tert*-butyl)benzylpyridinium cation under slow-heating activation.

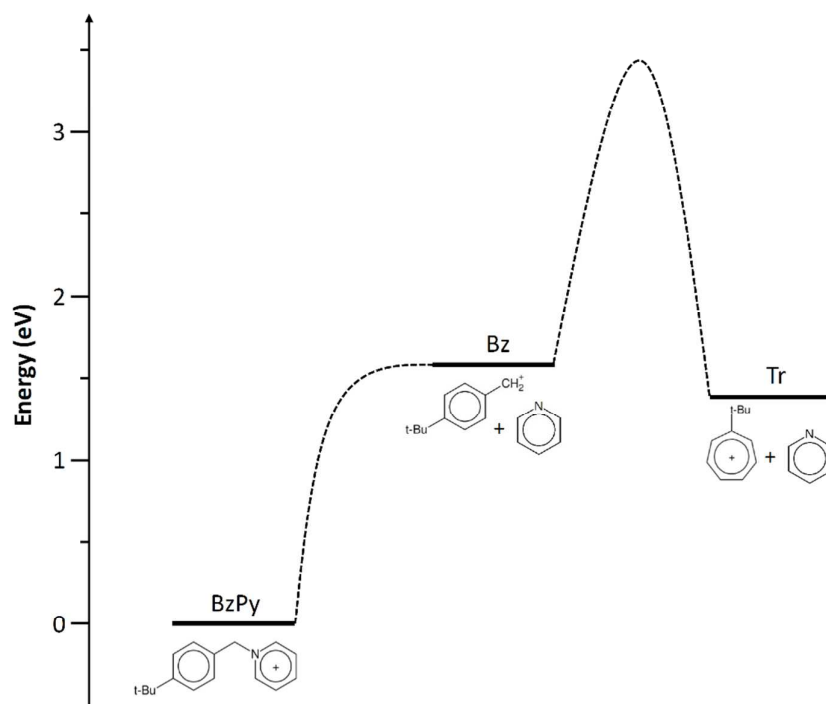

**Figure S-3.** IRMPD spectra of the *p*-(methyl)benzylpyridinium cation obtained using soft (blue trace) and harsh (red trace) source cone voltage conditions.

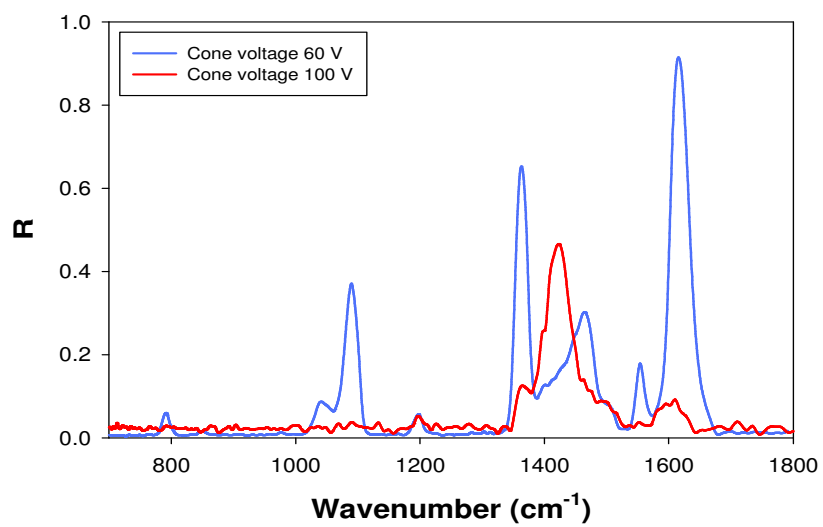

Supplement: Supplementary file 1 [file 3614583]
